# Supplementary material for: Hierarchical growth of ZnO nanorods over SnO2 seed layer: insights into electronic properties from photocatalytic activity
Source: Royal Society of Chemistry journal article supplement (doi:10.1039/c5ra23824b), 2015-12-22
Supplement: c5ra23824b1.pdf [file c5ra23824b1.pdf]

**ELECTRONIC SUPPLEMENTARY INFORMATION (ESI)**

**Hierarchical growth of ZnO nanorods over SnO<sub>2</sub> seed layer: Insights  
into electronic properties from photocatalytic activity**

Luís F. da Silva,<sup>a\*</sup> Osmando F. Lopes,<sup>b</sup> Ariadne C. Catto,<sup>c</sup> Waldir Avansi Jr.,<sup>d</sup> Maria I.

B. Bernardi,<sup>c</sup> Máximo S. Li,<sup>c</sup> Caue Ribeiro<sup>b</sup> and Elson Longo<sup>a</sup>

*a – LIEC, Instituto de Química, Universidade Estadual Paulista, P.O. Box 355, 14800-900, Araraquara, SP, Brazil*

*b – EMBRAPA Instrumentação, Rua XV de novembro, 1452, 13560-970, São Carlos, SP, Brazil*

*c – Instituto de Física de São Carlos, Universidade de São Paulo, Avenida Trabalhador São-carlense, 400, 13566-590, São Carlos, SP, Brazil.*

*d – Departamento de Física, Universidade Federal de São Carlos, Rodovia Washington Luiz, km 235, 13565-905, São Carlos, SP, Brazil.*

**Corresponding author**

\*E-mail: [lfsilva83@gmail.com](mailto:lfsilva83@gmail.com)

## **1. Preparation of nanostructured SnO<sub>2</sub> thin film used as seed layer**

To prepare the seed layer, a polymeric SnO<sub>2</sub> resin was synthesized via polymeric precursor. A tin citrate was chosen as precursor in preparation of the cationic resin precursor to obtain the SnO<sub>2</sub>, prepared according to the method proposed by Besso (see M. M. Besso, US Patent 3123120 (10/19/1965)). First, 50 cm<sup>3</sup> of an ammonia solution was introduced dropwise at room temperature in 100cm<sup>3</sup> of an aqueous solution containing citric acid (CA) and dichloride tin. When the pH of the solution reached a value between 2.5 and 3.0, precipitates of tin citrate were filtered and washed, respectively. The white precipitate was dried in air at 60 °C for 24h. The CA was dissolved with minimal water at ambient temperature and then added tin citrate and finally the ethyleneglicol. The molar ratio of CA: metal was 3: 1 and the amount of EG, as determined by mass ratio was 60:40.

The resin viscosity was adjusted by water evaporation until reach 12 cP (centipoise) using a rheometer (Brookfield, LVDV-III ULTRA). Afterwards, the solution was spin-coated onto SiO<sub>2</sub>/Si (with Pt electrodes) substrate by using a speed of 10000 rpm for 60 s, followed by water evaporation at 100 °C for 30 min. A two-stage heat treatment was performed as follows: initial heating at 300 °C for 30 min with a heating rate of 1 °C.min<sup>-1</sup> in air atmosphere to pyrolyze the organic compounds followed by an annealing for 2 hours at 500 °C with a heating rate of 5 °C.min<sup>-1</sup> for crystallization process.

## 2. Atomic force microscopy analysis

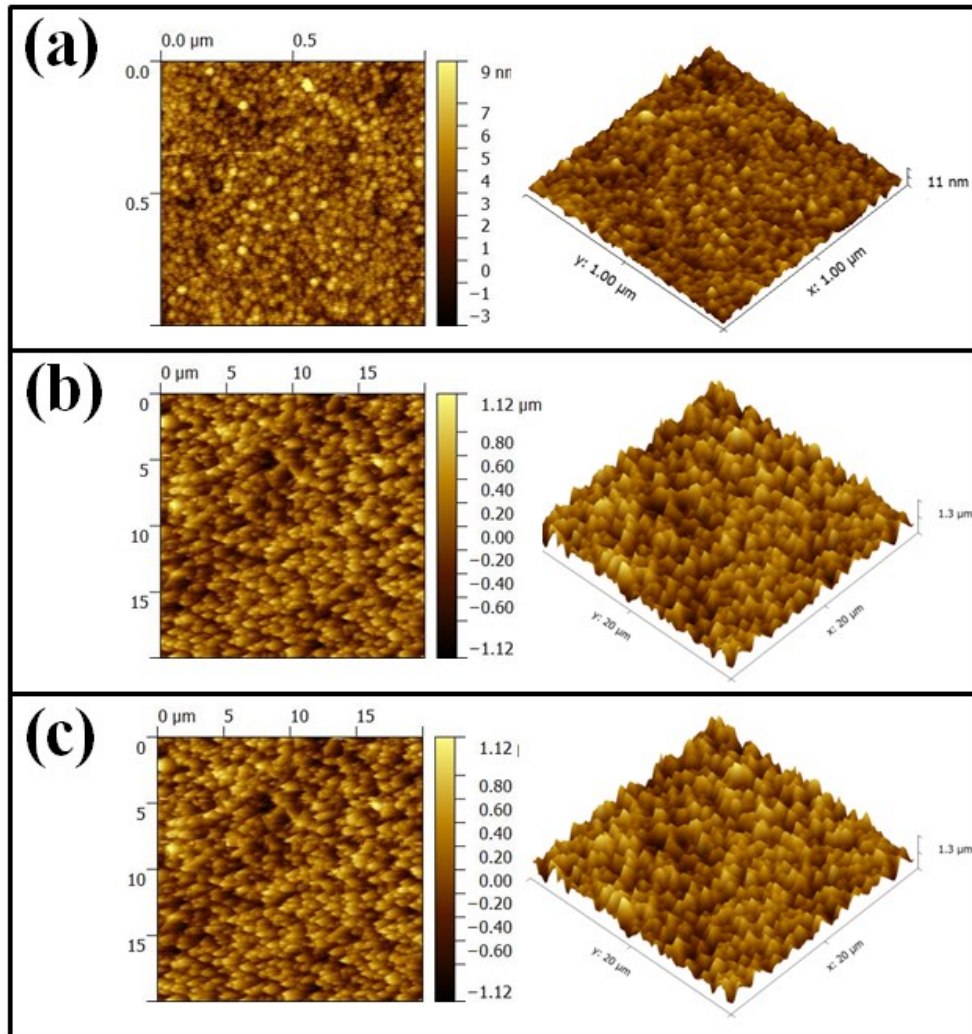

**Figure S1.** Atomic force microscopy (AFM) images. (a) SnO<sub>2</sub> seed layer, (b) ZnO nanorods grown over a ZnO seed layer, and (c) ZnO nanorods grown over a SnO<sub>2</sub> seed layer exhibited in (a).

### 3. Field emission scanning electron microscopy analysis

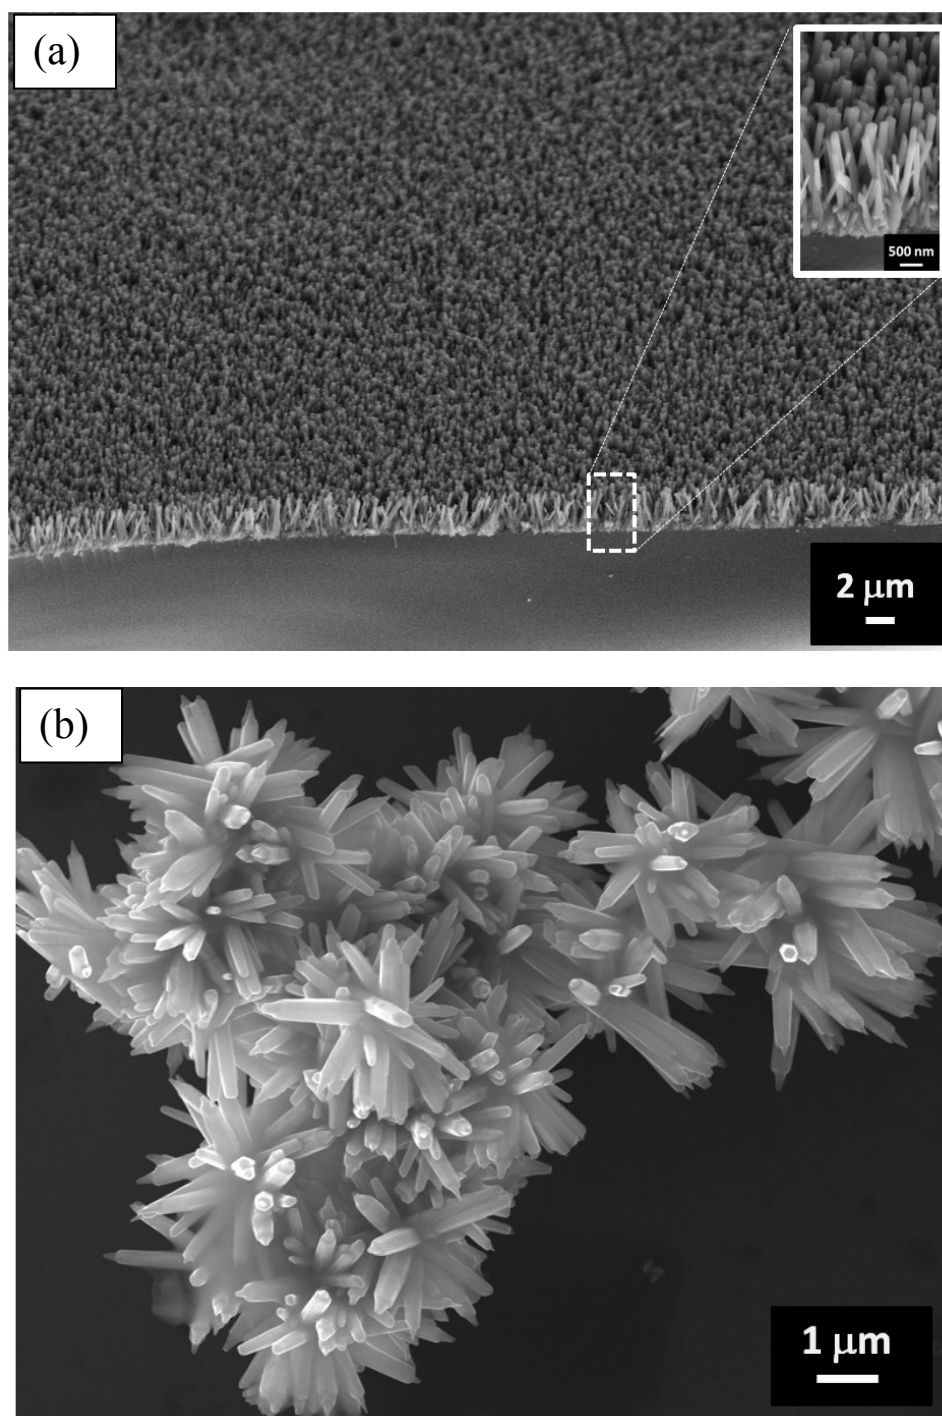

**Figure S2.** Field emission scanning electron microscopy (FESEM) images of (a) ZnO nanorods grown on a ZnO thin film and (b) as-prepared ZnO powder obtained by the hydrothermal treatment.

## 4. X-ray photoelectron spectroscopy analysis

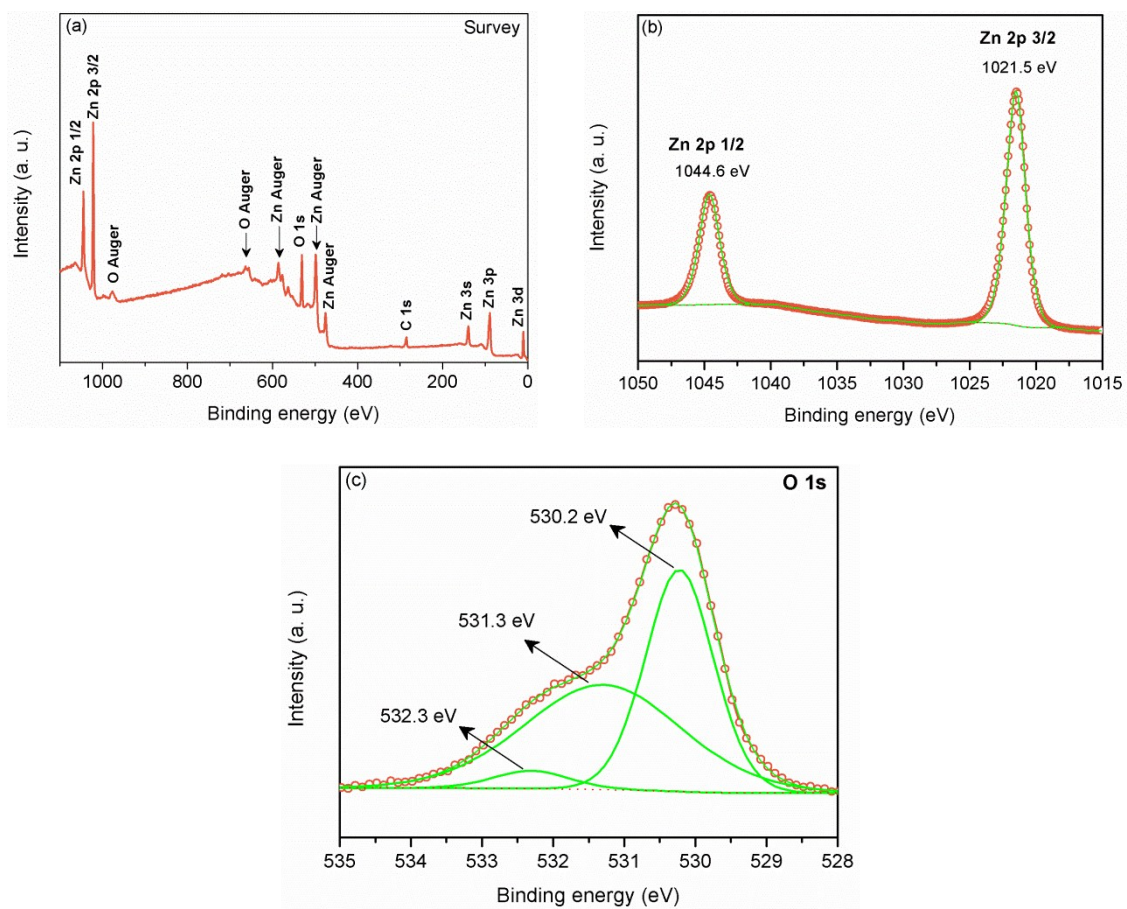

**Figure S3.** XPS spectra of the ZnO–ZnO sample. (a) Survey XPS scan spectrum, (b) Zn 2p, and (c) O 1s core levels.

**Table S1.** XPS results obtained from the deconvolution of the O 1s core levels.

| Sample               | Position (eV) | Area (%) | FWHM | Atomic conc. (%) |
|----------------------|---------------|----------|------|------------------|
| ZnO–ZnO              | 530.2         | 57409.4  | 1.1  | 45.9             |
|                      | 531.3         | 62560.4  | 2.6  | 50.0             |
|                      | 532.3         | 5105.6   | 1.3  | 4.1              |
| ZnO–SnO <sub>2</sub> | 530.1         | 55436.8  | 1.1  | 35.7             |
|                      | 531.3         | 83657.5  | 2.6  | 53.9             |
|                      | 532.1         | 16075.6  | 1.4  | 10.4             |

## 5. Photocatalytic experiments

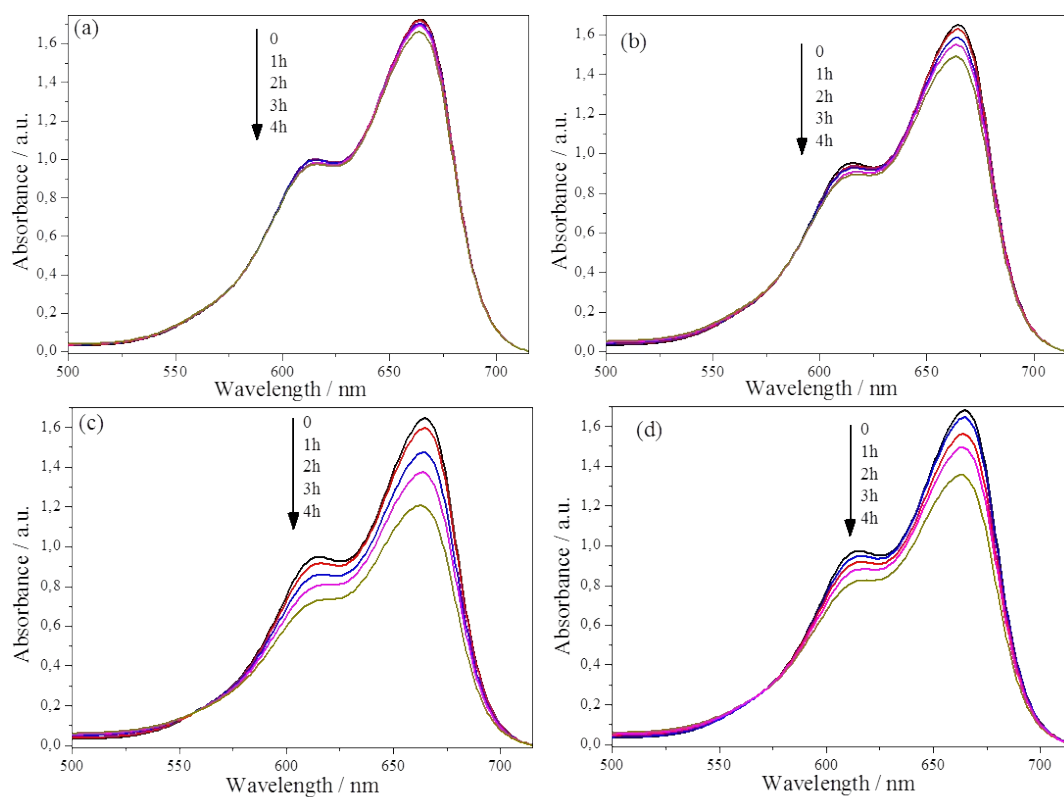

**Fig. S4** – UV-vis absorbance spectra of MB in different times of UV irradiation (a) pure and catalyzed by (b) SnO<sub>2</sub> seed layer, (c) ZnO-SnO<sub>2</sub> heterojunction and (d) ZnO-ZnO homojunction.

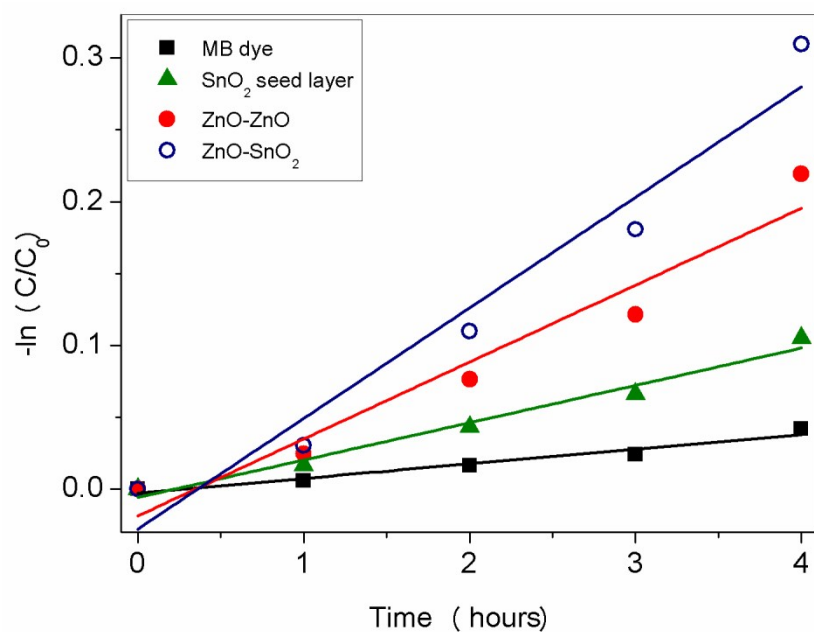

**Fig. S5** – Pseudo first-order kinetic for MB photodegradation catalyzed by different samples.
